# Supplementary material for: Converting cellulose nanocrystals into photocatalysts by functionalisation with titanium dioxide nanorods and gold nanocrystals
Source: Royal Society of Chemistry journal article supplement (doi:10.1039/d0ra05961g), 2020-01-01
Supplement: d0ra05961g1.pdf [file d0ra05961g1.pdf]

Supporting Information

## Converting Cellulose Nanocrystals into Photocatalysts by Functionalisation with Titanium Dioxide Nanorods and Gold Nanocrystals

Santhosh S Nair<sup>1#</sup>, Jianhong Chen,<sup>1#</sup> Adam Slabon,<sup>1\*</sup> Aji P Mathew<sup>1\*</sup>

<sup>1</sup>Division of Materials and Environmental Chemistry, Stockholm University, Frescativägen 8, 10691, Stockholm, Sweden

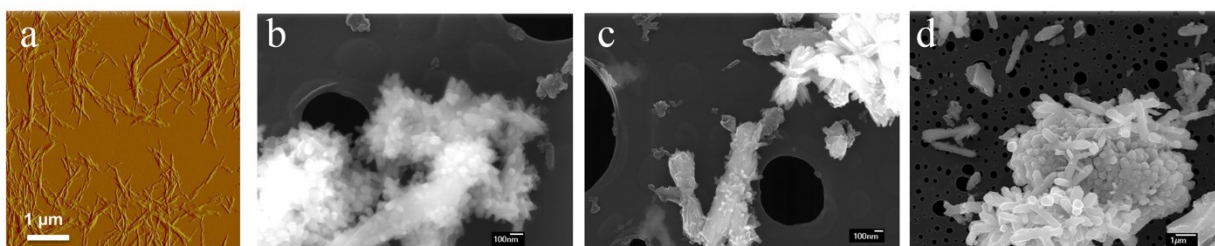

**Figure S1.** a) AFM images of typical CNCs produced by sulphuric acid hydrolysis and (b-d) CNC/TiO<sub>2</sub>-NRs hybrids based on sulphonyl, carboxyl and phosphoryl functionalized CNC nanocrystals.

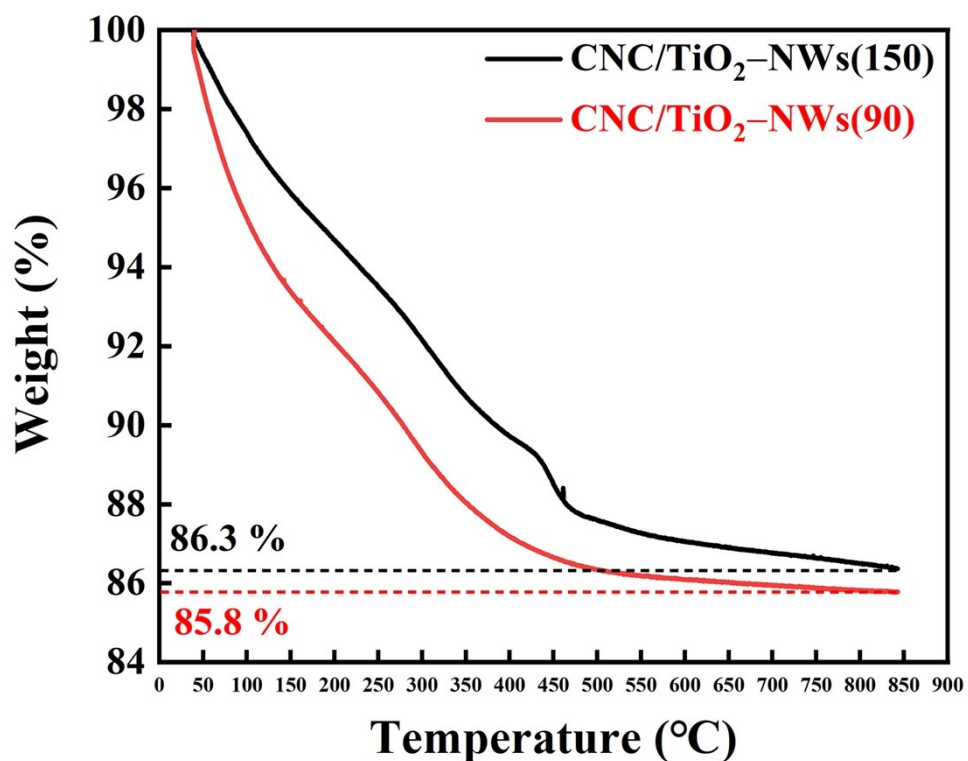

**Figure S2.** TGA curves of the CNC/TiO<sub>2</sub>-NRs (90), CNC/TiO<sub>2</sub>-NRs(150) (ramp 10 °C/min, 35–850 °C, in air)

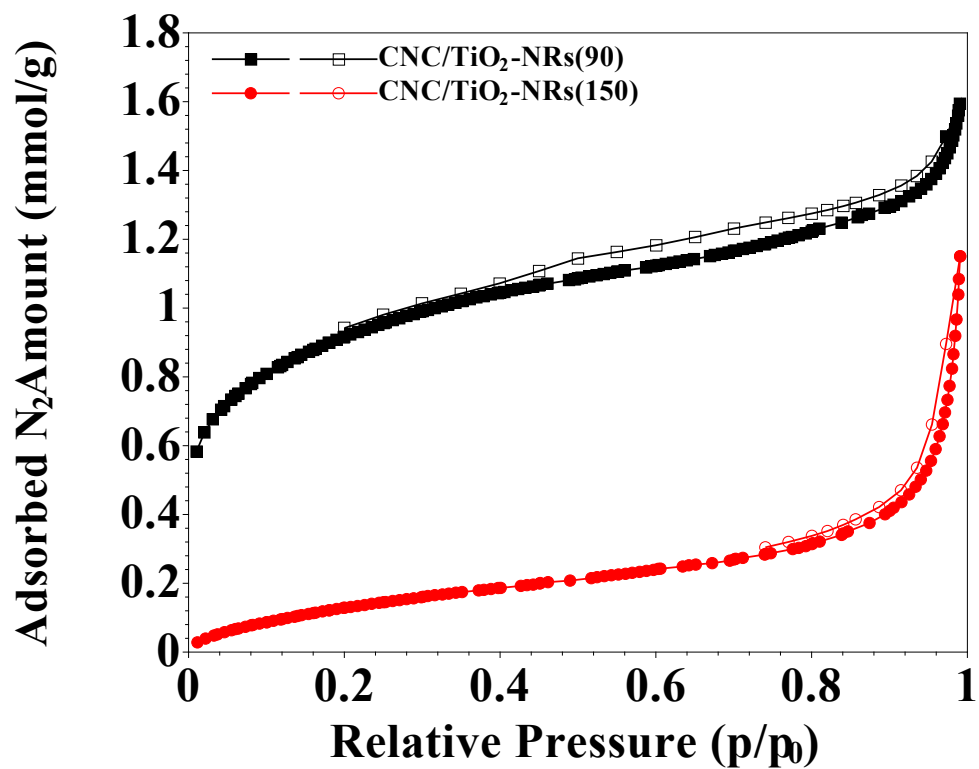

Figure S3. Nitrogen adsorption-desorption BET isotherms of CNC/TiO<sub>2</sub>-NRs (90) and CNC/TiO<sub>2</sub>-NRs(150)

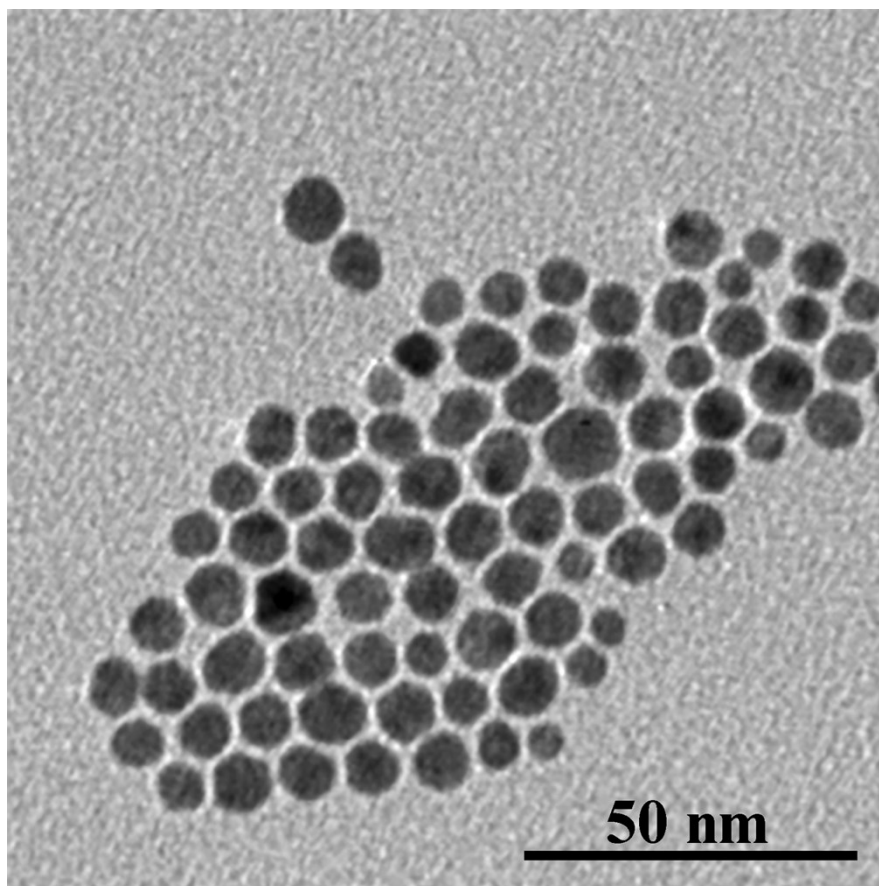

Figure S4. TEM image of Au NCs before decoration

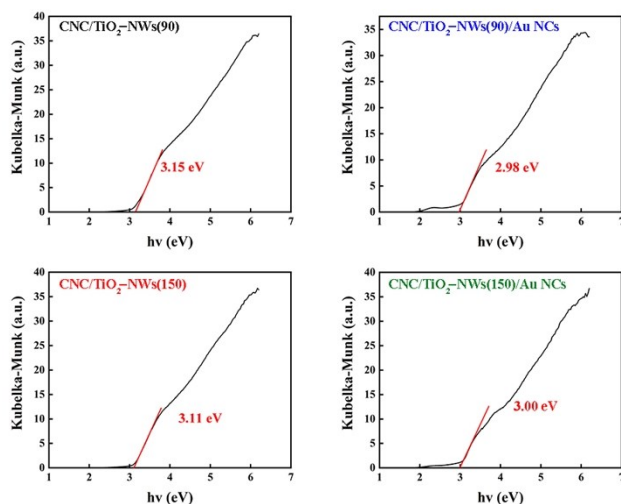

**Figure S5.** Tauc plot images of CNC/TiO<sub>2</sub>-NRs(90), CNC/TiO<sub>2</sub>-NRs(150), CNC/TiO<sub>2</sub>-NRs(90)/Au NCS and CNC/TiO<sub>2</sub>-NRs(150)/Au NCS

### Degradation mechanism

During the solar simulator illumination, LSPR-induced hot electrons in Au NCS on the surface of TiO<sub>2</sub> NRs with energies higher than the Schottky barrier energy can be injected into the conductive band (CB) of TiO<sub>2</sub>.<sup>1</sup> This process can significantly promote the separation of electron-hole pairs. The injected electrons in CB are trapped by absorbed O<sub>2</sub> molecules and then participated in the photoreduction reaction to get  $\cdot\text{O}_2^-$ . However,  $\cdot\text{O}_2^-$  is quite unstable in aqueous solution, so that it would readily decompose into hydroxyl radicals.<sup>2,3</sup>

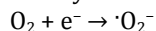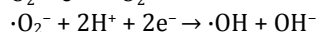

After the transfer of hot electrons, the holes on Au NCS are supposed to participate in photo-oxidation reaction with superoxide anion radicals  $\cdot\text{O}_2^-$ , yielding singlet oxygen ( $^1\text{O}_2$ ).<sup>4</sup>

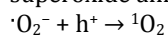

The photolysis of hydrogen peroxide in aqueous to hydroxyl radicals happened simultaneously, following the reaction:

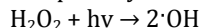

Finally, the reactive oxygen species including  $\cdot\text{OH}$ ,  $\cdot\text{O}_2^-$  and  $^1\text{O}_2$  can easily degrade RhB into CO<sub>2</sub> and H<sub>2</sub>O.<sup>5,6</sup>

1. Furube, A.; Du, L.; Hara, K.; Katoh, R.; Tachiya, M. Ultrafast plasmon-induced electron transfer from gold nanodots into TiO<sub>2</sub> nanoparticles. *J. Am. Chem. Soc.* **2007**, *129*, 14852-14853.
2. Shi, H.; Wang, X.; Zheng, M.; Wu, X.; Chen, Y.; Yang, Z.; Zhang, G.; Duan, H. Hot-Electrons Mediated Efficient Visible-Light Photocatalysis of Hierarchical Black Au-TiO<sub>2</sub> Nanorod Arrays on Flexible Substrate. *Adv. Mater. Interfaces* **2016**, *3*, 1600588.
3. Sulek, A.; Pucelik, B.; Kunczewicz, J.; Dubin, G.; Dąbrowski, J. M. Sensitization of TiO<sub>2</sub> by halogenated porphyrin derivatives for visible light biomedical and environmental photocatalysis. *Catal. Today* **2019**, *335*, 538-549.
4. Li, B.; Hao, Y.; Shao, X.; Tang, H.; Wang, T.; Zhu, J.; Yan, S. Synthesis of hierarchically porous metal oxides and Au/TiO<sub>2</sub> nanohybrids for photodegradation of organic dye and catalytic reduction of 4-nitrophenol. *J. Catal.* **2015**, *329*, 368-378.
5. Ansari, S. A.; Khan, M. M.; Ansari, M. O.; Cho, M. H. Gold nanoparticles-sensitized wide and narrow band gap TiO<sub>2</sub> for visible light applications: a comparative study. *New J. Chem.* **2015**, *39*, 4708-4715.
6. Yin, M.; Li, Z.; Kou, J.; Zou, Z. Mechanism investigation of visible light-induced degradation in a heterogeneous TiO<sub>2</sub>/Eosin Y/Rhodamine B system. *Environ. Sci. Technol.* **2009**, *43*, 8361-8366.
